# Supplementary material
Source: publisher figshare collection journal article supplement (https://acs.figshare.com/ndownloader/files/4030870)
Supplement: Supplementary file 1 [file 4030870]

# Sustainable Recycling of Benzoic Acid Production Waste: Green and Highly Efficient Methods to Separate and Recover High Value-Added Conjugated Aromatic Compounds from Industrial Residues

*Xin Zhang,<sup>†‡</sup> Pengwei Qiao,<sup>†</sup> Xuan Ji,<sup>†</sup> Junbin Han,<sup>†</sup> Lili Liu,<sup>†</sup> Brandon L. Weeks,<sup>‡</sup> Qingwei Yao,<sup>§</sup> and Zhao Zhang<sup>\*†</sup>*

<sup>†</sup>School of Chemistry and Chemical Engineering, Shanxi University, 92 Wucheng Road, Taiyuan 030006, China

<sup>‡</sup>Department of Chemical Engineering, Texas Tech University, 6th and Canton, Lubbock, TX 79409, USA

<sup>§</sup>Sphinx Scientific Laboratory Corporation, 1250 1/2 E. State Street, Sycamore, IL 60178, USA

## Supporting Information

a.

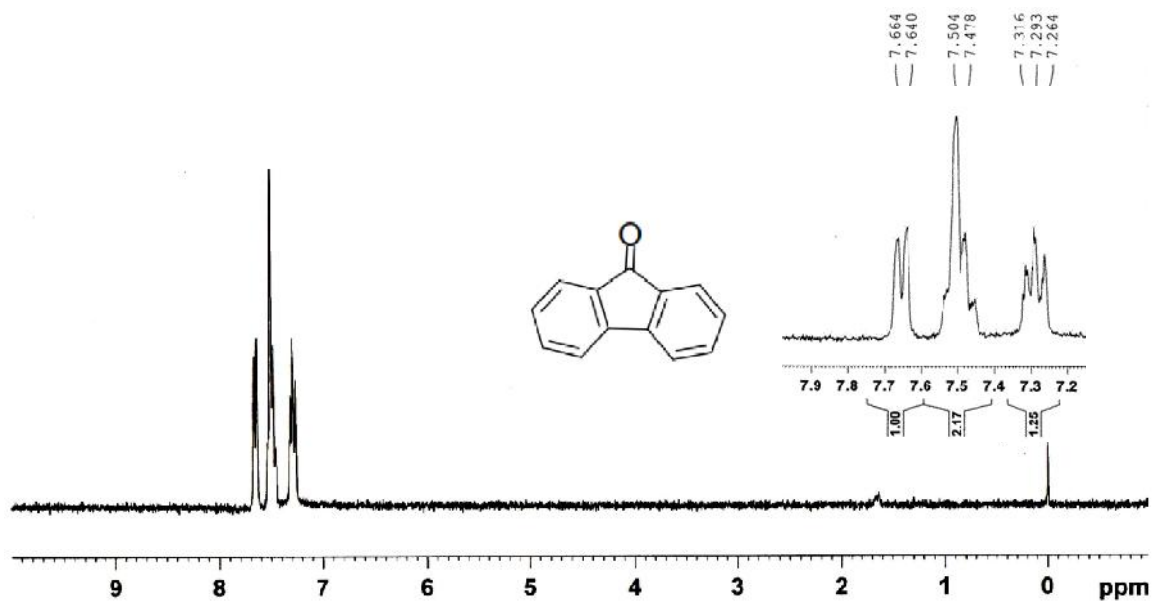

b.

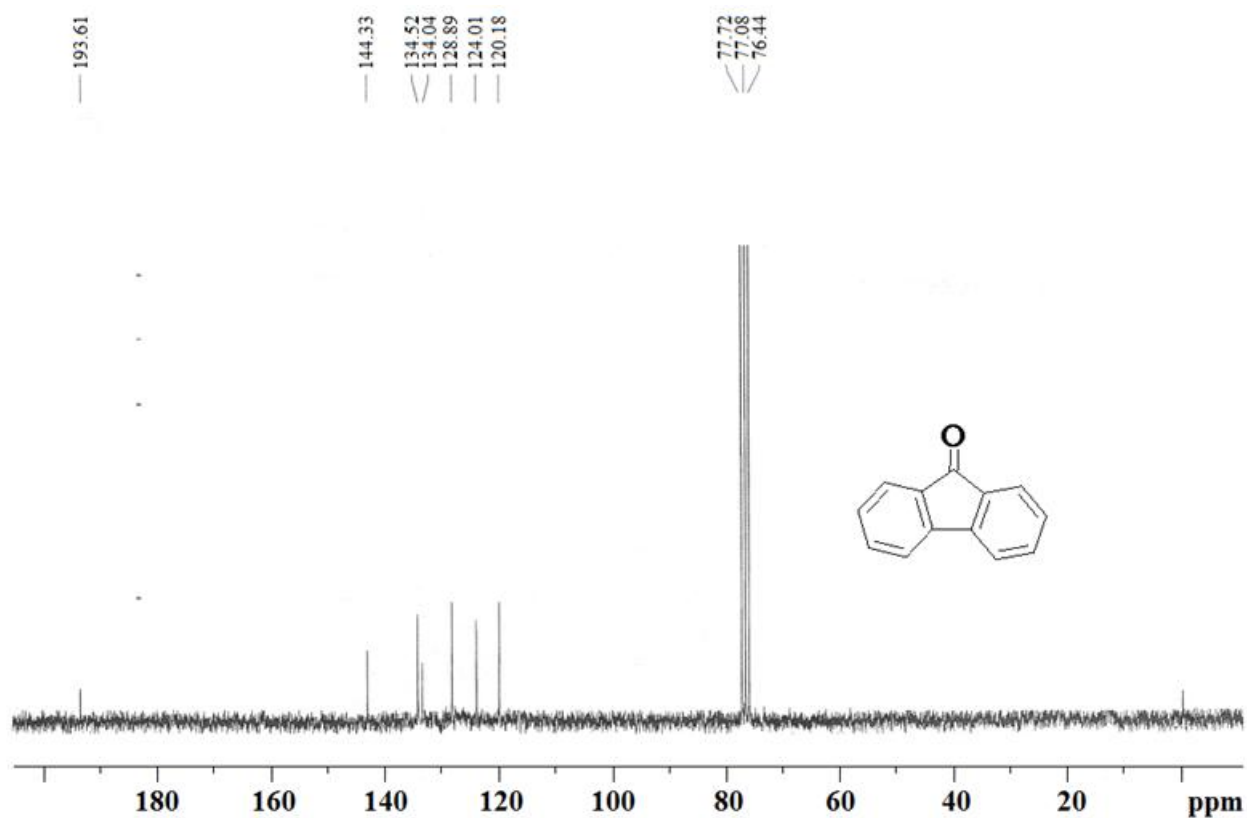

**Figure S1.** <sup>1</sup>H and <sup>13</sup>C NMR spectra of 9-fluorenone (in CDCl<sub>3</sub>)

## Supporting Information

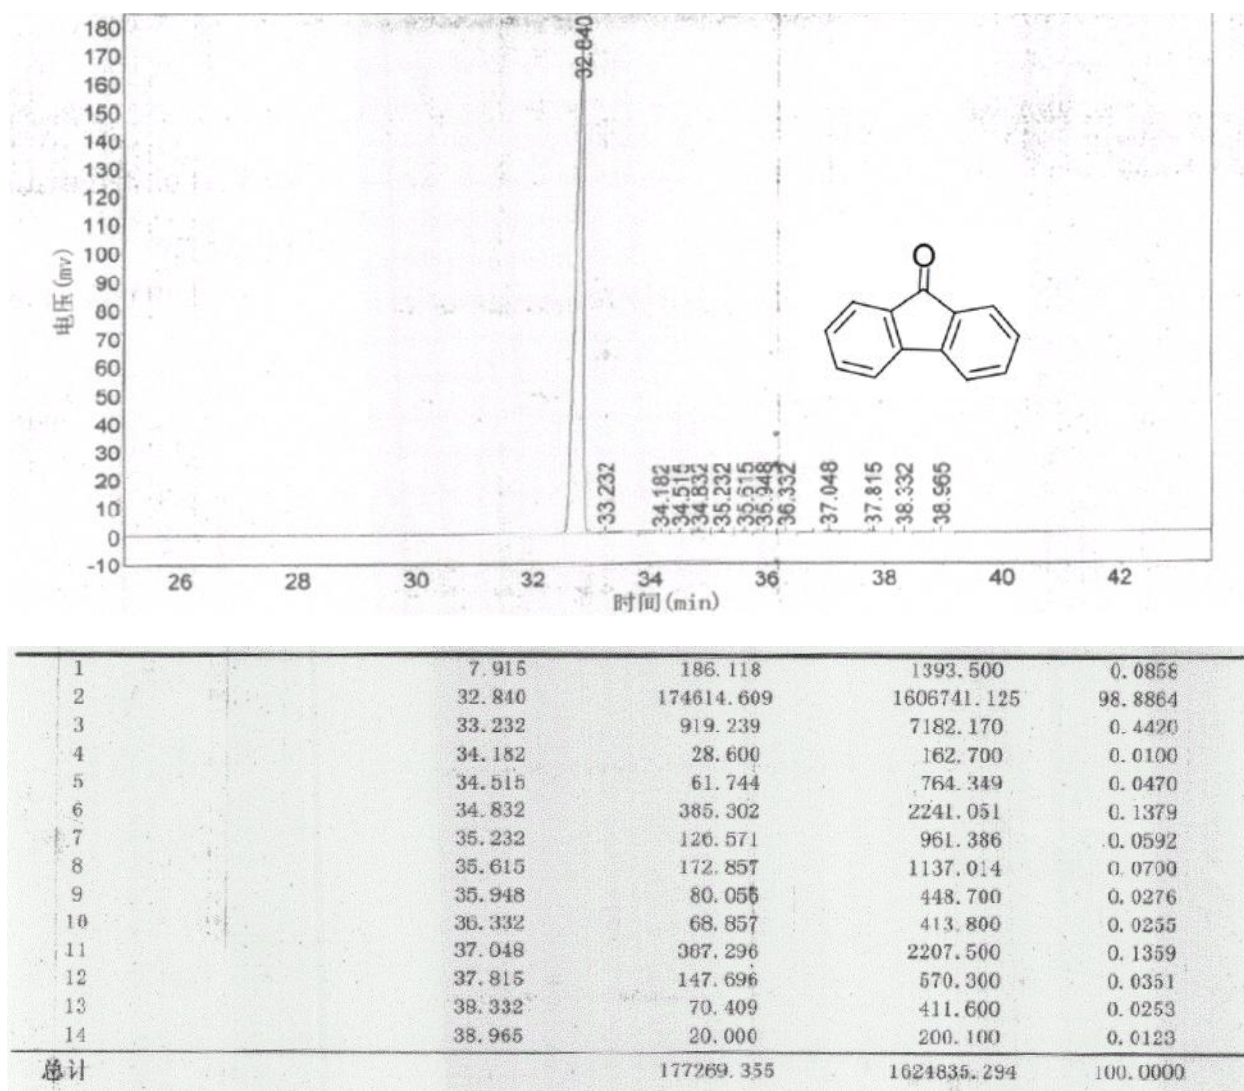

**Figure S2.** HPLC trace of 9-fluorenone

# Supporting Information

a.

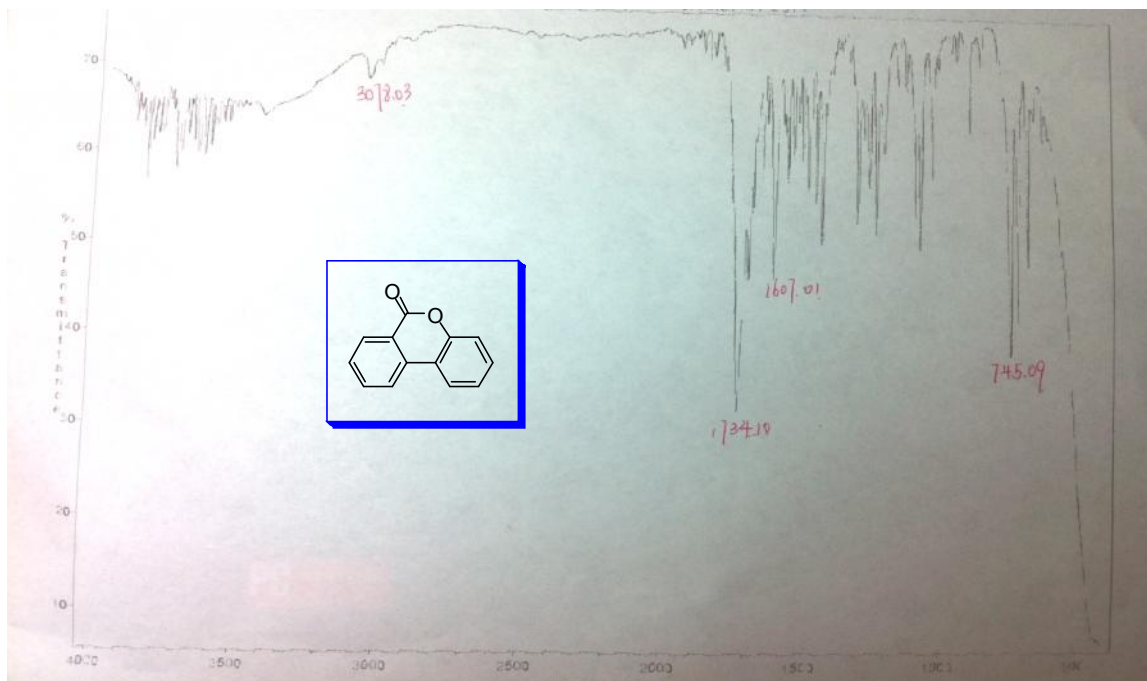

b.

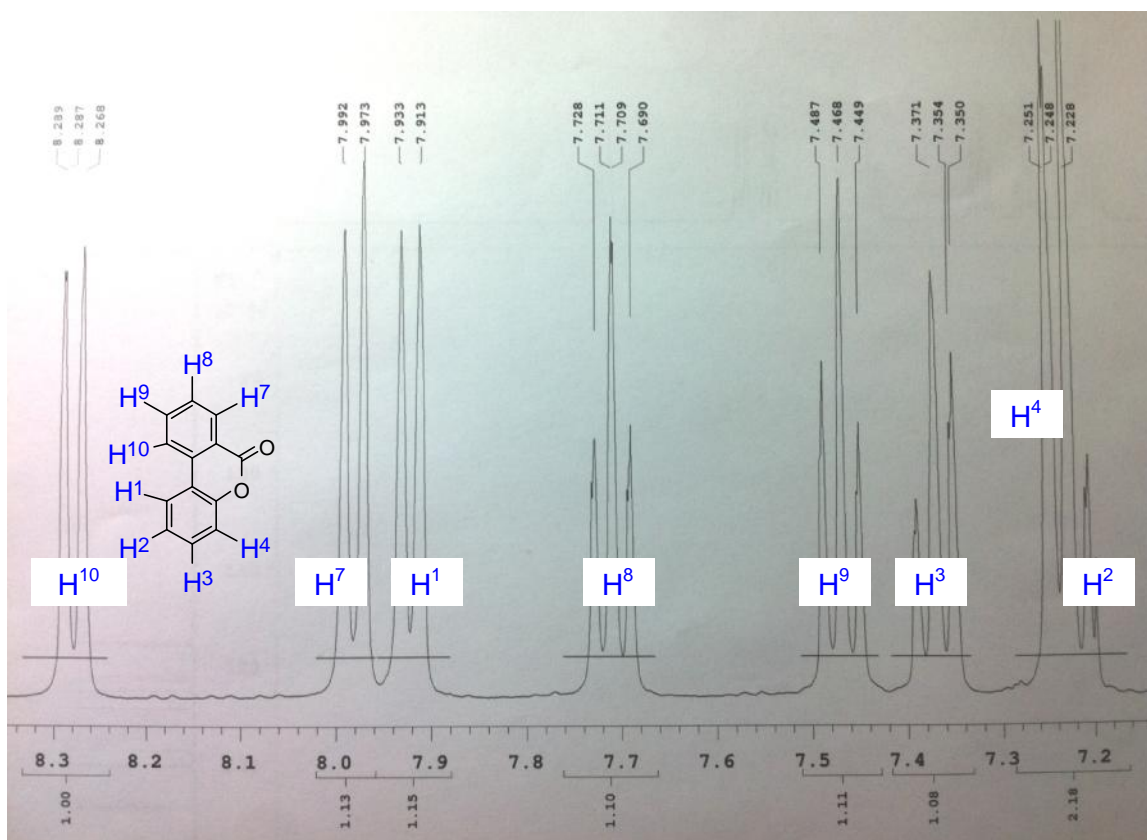

# Supporting Information

c.

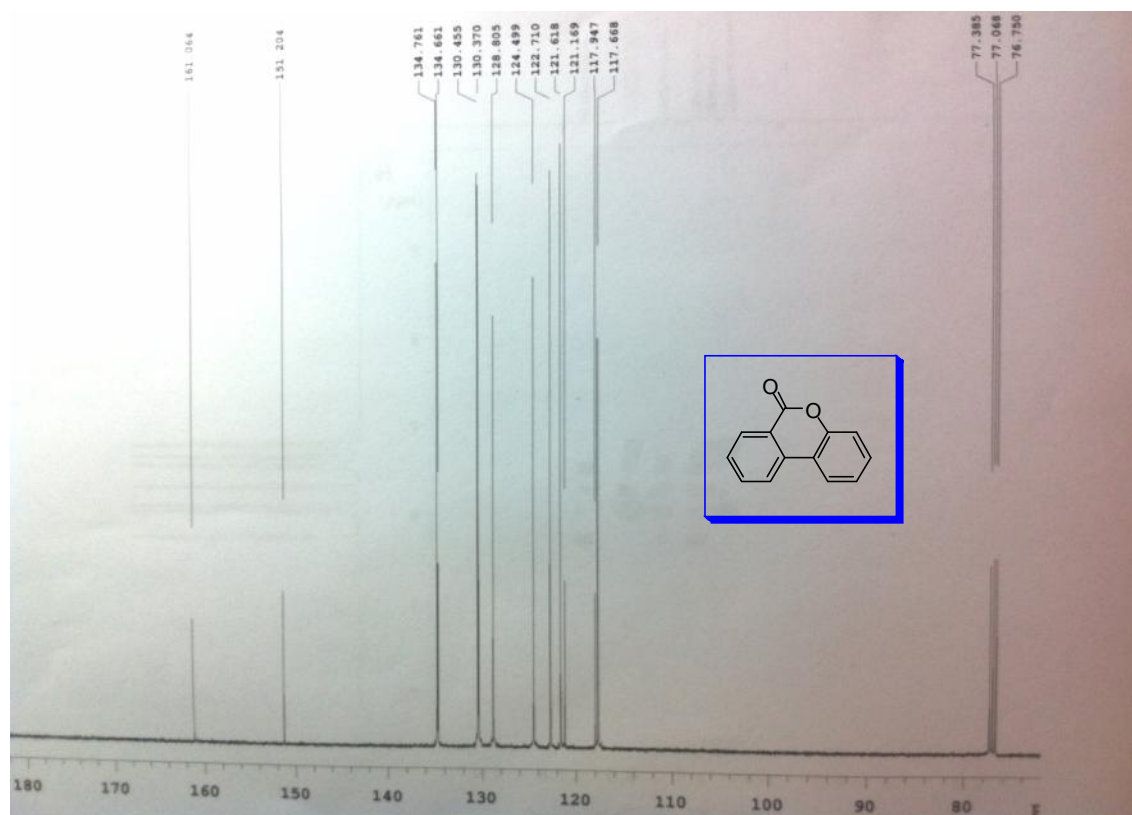

d.

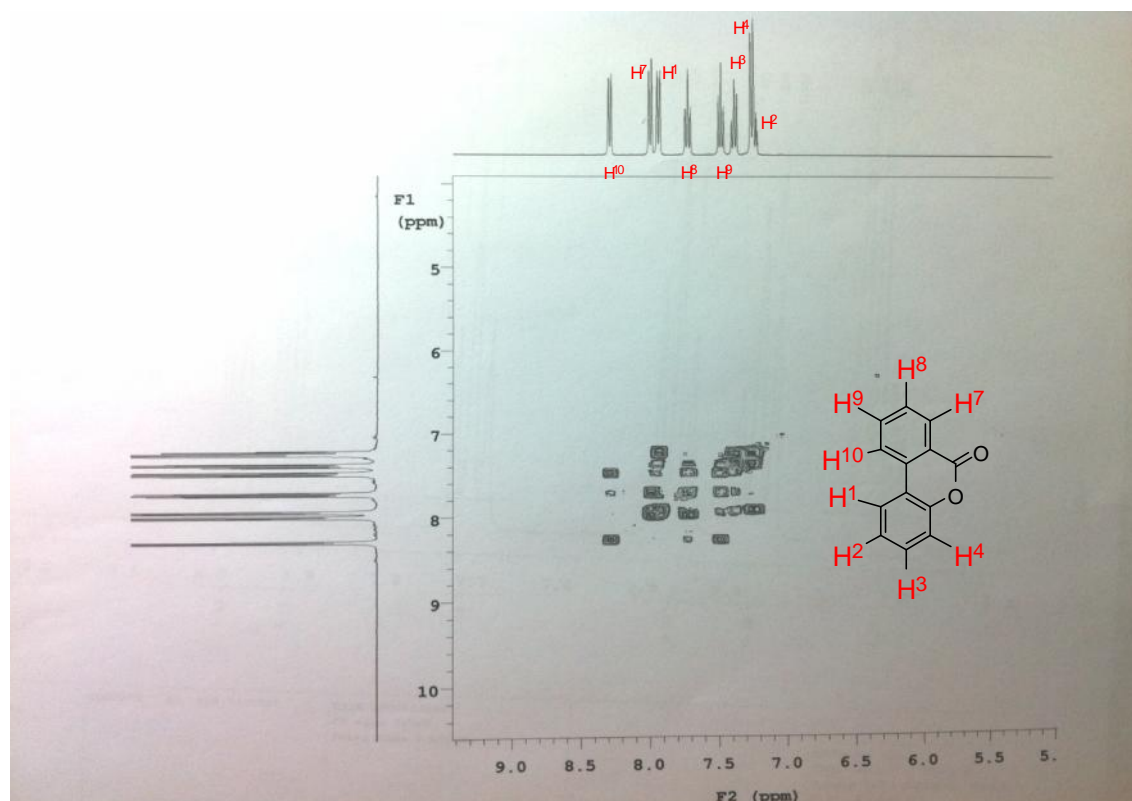



## Supporting Information

e.

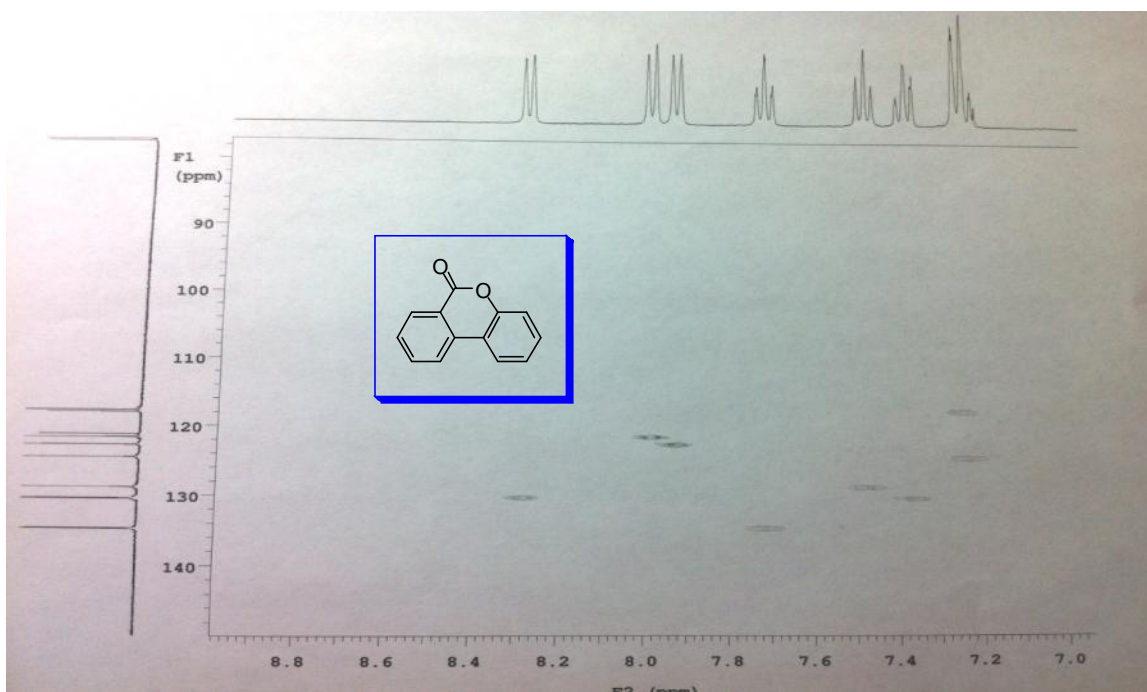

f.

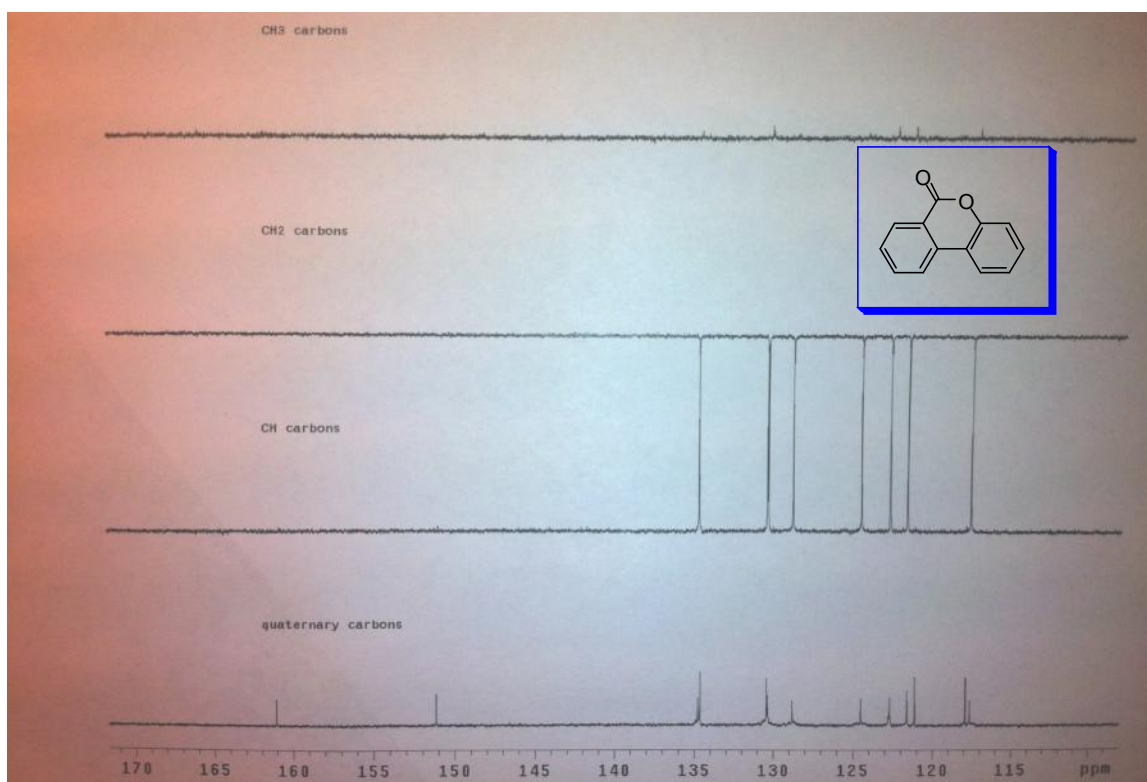

**Figure S3.** FTIR, <sup>1</sup>H and <sup>13</sup>C NMR, COSY, and DEPT spectra of 6H-benzo[c]chromen-6-one

## Supporting Information

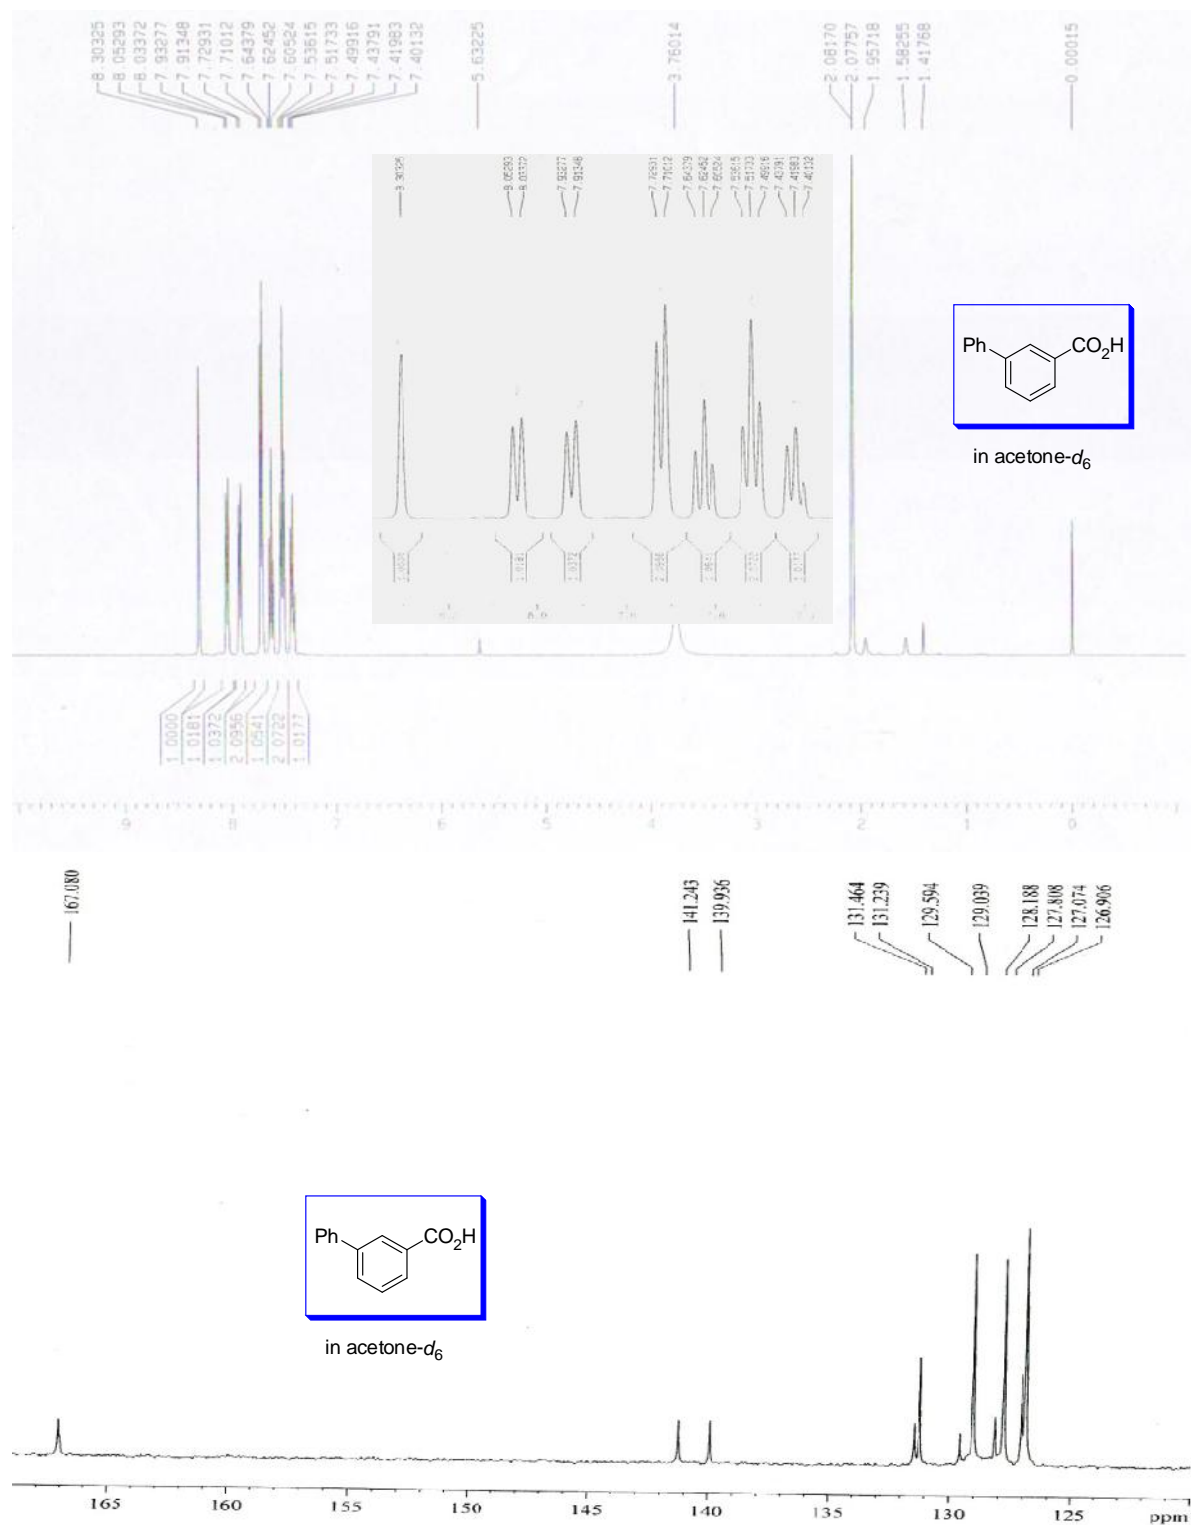

**Figure S4.** <sup>1</sup>H and <sup>13</sup>C NMR spectra of biphenyl-3-carboxylic acid

## Supporting Information

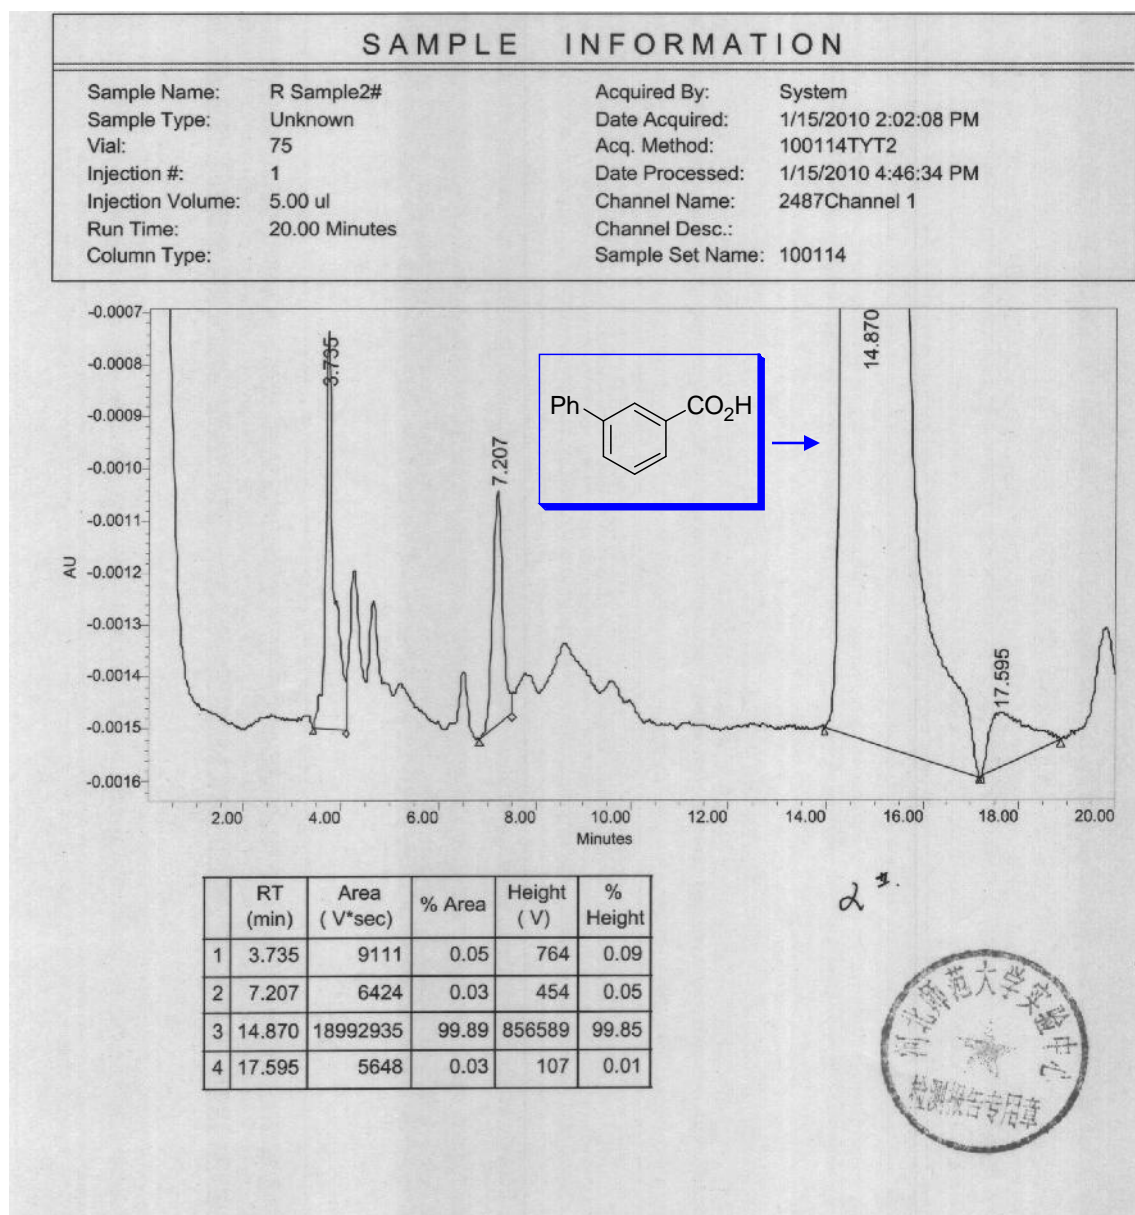

**Figure S5.** HPLC trace of biphenyl-3-carboxylic acid



# Supporting Information

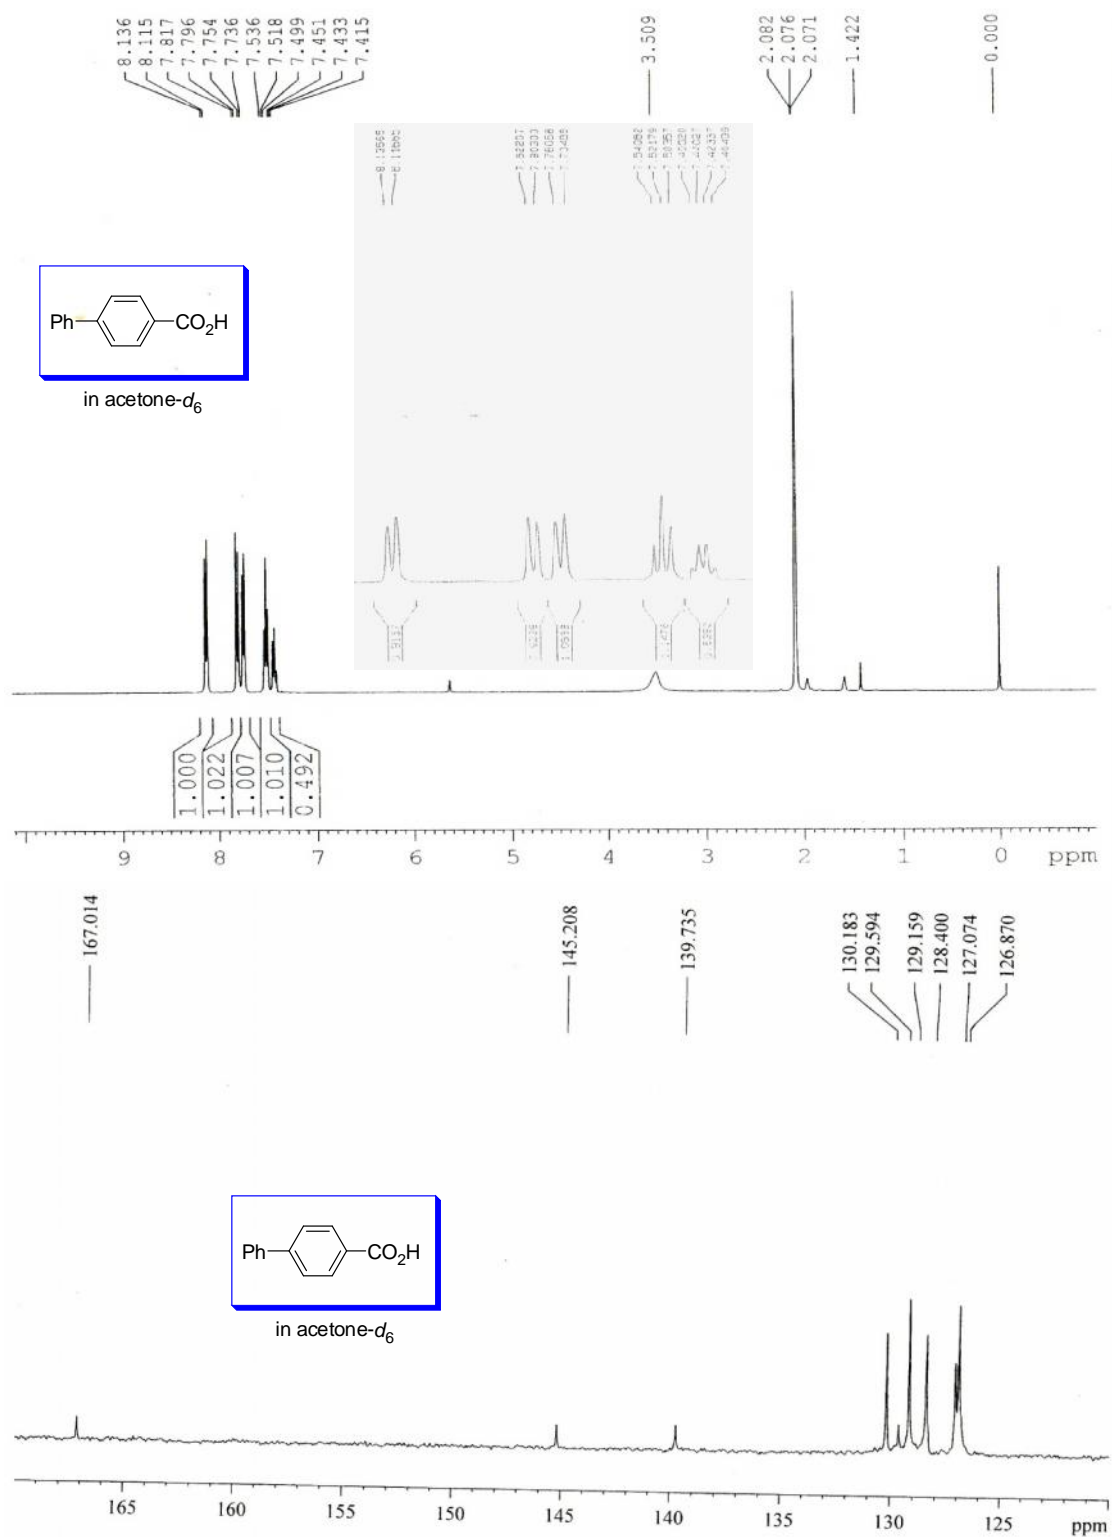

**Figure S6.** <sup>1</sup>H and <sup>13</sup>C NMR spectra of biphenyl-4-carboxylic acid

## Supporting Information

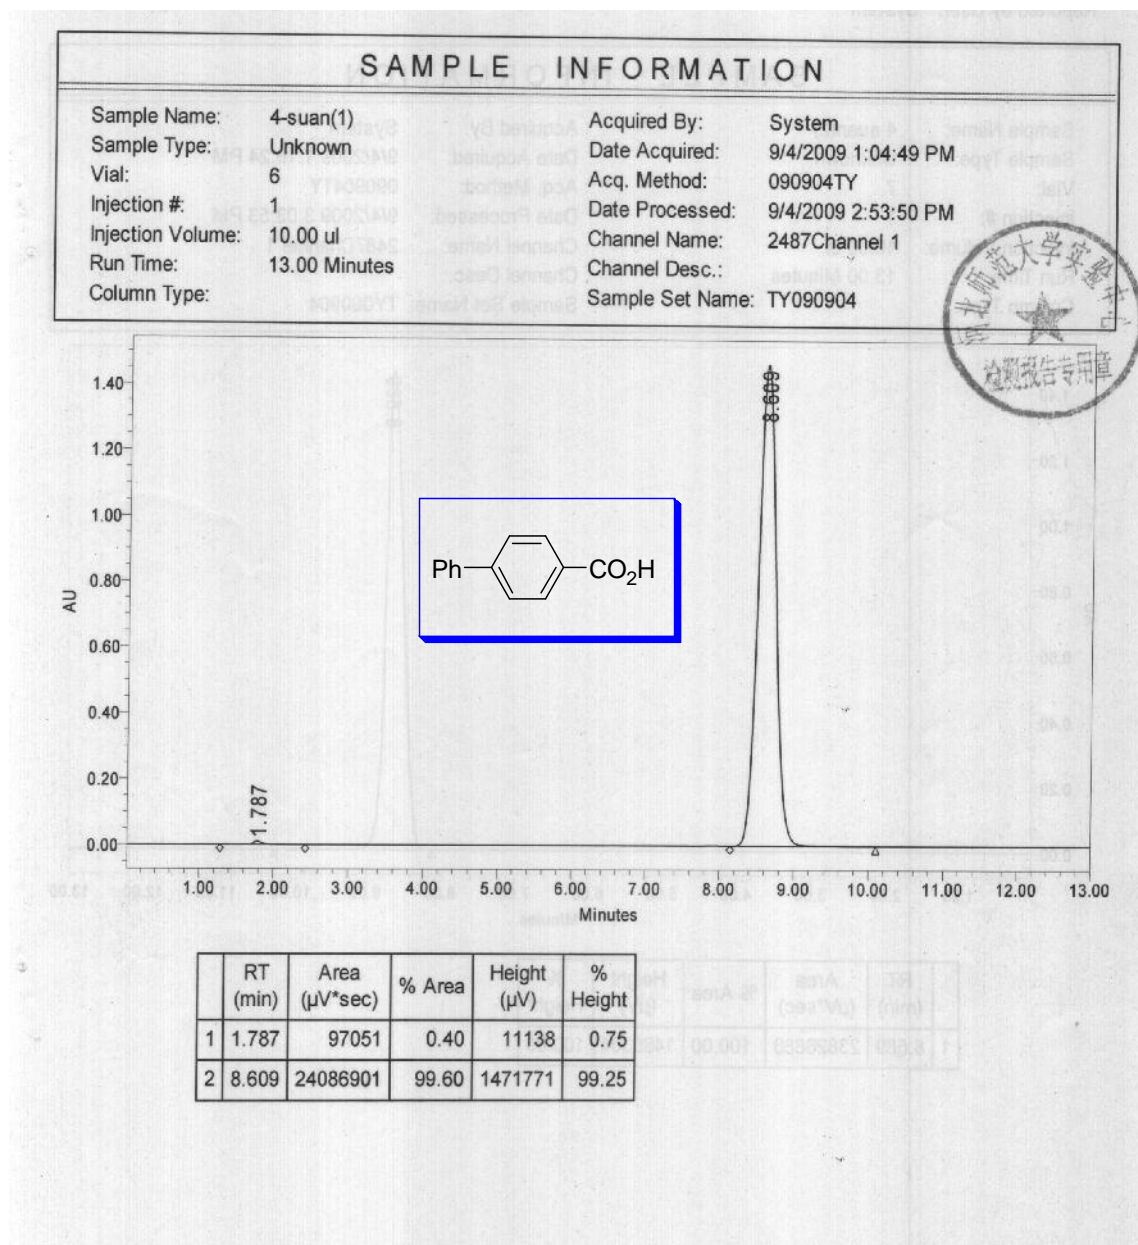

**Figure S7.** HPLC trace of biphenyl-4-carboxylic acid

# Supporting Information

| PK# | RT    | Area% | Library/ID                                                                                                                | Ref#                                                                 | CAS# | Qual                                                                                 |
|-----|-------|-------|---------------------------------------------------------------------------------------------------------------------------|----------------------------------------------------------------------|------|--------------------------------------------------------------------------------------|
| 1   | 6.92  | 0.56  | D:\Database\NIST02.L<br>p-Xylene<br>Benzene, 1,3--dimethyl-<br>o-Xylene                                                   | 4953 000106-42-3 97<br>4977 000108-38-3 97<br>4908 000095-47-6 97    |      | 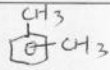    |
| 2   | 8.59  | 1.05  | D:\Database\NIST02.L<br>Styrene<br>Styrene<br>Styrene                                                                     | 4756 000100-42-5 97<br>4755 000100-42-5 97<br>4757 000100-42-5 96    |      |     |
| 3   | 10.92 | 0.32  | D:\Database\NIST02.L<br>Benzaldehyde<br>Benzaldehyde<br>Benzaldehyde                                                      | 4944 000100-52-7 95<br>4941 000100-52-7 91<br>4943 000100-52-7 90    |      |     |
| 4   | 15.59 | 1.25  | D:\Database\NIST02.L<br>Benzyl Alcohol<br>Benzyl Alcohol<br>Benzyl Alcohol                                                | 5228 000100-51-6 95<br>5229 000100-51-6 95<br>5227 000100-51-6 94    |      |     |
| 5   | 16.36 | 0.13  | D:\Database\NIST02.L<br>1,1'-Biphenyl, 2-methyl-<br>Fluorene, 1,4-dihydro-<br>1,1'-Biphenyl, 2-methyl-                    | 34872 000643-58-3 96<br>34866 041593-21-9 93<br>34879 000643-58-3 91 |      |    |
| 6   | 17.59 | 0.86  | D:\Database\NIST02.L<br>Diphenylmethane<br>Diphenylmethane<br>Diphenylmethane                                             | 34864 000101-81-5 95<br>34863 000101-81-5 94<br>34862 000101-81-5 93 |      |    |
| 7   | 18.19 | 0.16  | D:\Database\NIST02.L<br>Cyclohexanecarboxylic acid<br>Cyclohexanecarboxylic acid<br>Cyclohexanecarboxylic acid            | 11822 000098-89-5 98<br>11818 000098-89-5 97<br>11821 000098-89-5 94 |      |   |
| 8   | 18.62 | 1.28  | D:\Database\NIST02.L<br>1,1'-Biphenyl, 4-methyl-<br>1,1'-Biphenyl, 4-methyl-<br>1,1'-Biphenyl, 3-methyl-                  | 34877 000644-08-6 94<br>34870 000644-08-6 90<br>34875 000643-93-6 81 |      |  |
| 9   | 18.71 | 0.65  | D:\Database\NIST02.L<br>Bibenzyl<br>Bibenzyl<br>Bibenzyl                                                                  | 44169 000103-29-7 90<br>44168 000103-29-7 83<br>44170 000103-29-7 53 |      |  |
| 10  | 18.80 | 1.08  | D:\Database\NIST02.L<br>1,1'-Biphenyl, 4-methyl-<br>1,1'-Biphenyl, 4-methyl-<br>Diphenylmethane                           | 34877 000644-08-6 93<br>34876 000644-08-6 93<br>34864 000101-81-5 93 |      |  |
| 11  | 18.91 | 0.58  | D:\Database\NIST02.L<br>Benzene, 1-methyl-4-(phenylmeth...<br>Benzene, 1-methyl-4-(phenylmeth...<br>2,2'-Dimethylbiphenyl | 44201 006020-83-7 96<br>44202 000620-83-7 95<br>44175 000605-39-0 94 |      |  |
| 12  | 19.04 | 0.68  | D:\Database\NIST02.L<br>(E)-Stillbene<br>(E)-Stillbene<br>cis-Stillbene                                                   | 42776 000103-30-0 93<br>42773 000103-30-0 90<br>42775 000645-49-8 90 |      |  |

# Supporting Information

|    |       |      |                                    |                      |                                                                                      |  |
|----|-------|------|------------------------------------|----------------------|--------------------------------------------------------------------------------------|--|
| 13 | 19.91 | 0.26 | D:\Database\NIST02.L               |                      |                                                                                      |  |
|    |       |      | 3,3'-Dimethylbiphenyl              | 44178 000612-75-9 97 | 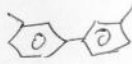   |  |
|    |       |      | 3,3'-Dimethylbiphenyl              | 44177 000612-75-9 96 |                                                                                      |  |
|    |       |      | 3,3'-Dimethylbiphenyl              | 44173 000612-75-9 96 |                                                                                      |  |
| 14 | 20.10 | 0.28 | D:\Database\NIST02.L               |                      |                                                                                      |  |
|    |       |      | 1,1'-Biphenyl, 3,4'-dimethyl-      | 44193 007383-90-6 98 |    |  |
|    |       |      | 3,3'-Dimethylbiphenyl              | 44173 000612-75-9 96 |                                                                                      |  |
|    |       |      | 3,3'-Dimethylbiphenyl              | 44178 000612-75-9 94 |                                                                                      |  |
| 15 | 20.30 | 0.45 | D:\Database\NIST02.L               |                      |                                                                                      |  |
|    |       |      | 1,1'-Biphenyl, 3,4'-dimethyl-      | 44193 007383-90-6 98 |    |  |
|    |       |      | 1,1'-Biphenyl, 3,4'-dimethyl-      | 44191 007383-90-6 95 |                                                                                      |  |
|    |       |      | 4,4'-Dimethylbiphenyl              | 44181 000613-33-2 93 |                                                                                      |  |
| 16 | 22.14 | 0.86 | D:\Database\NIST02.L               |                      |                                                                                      |  |
|    |       |      | Fluorene                           | 33358 000086-73-7 94 |    |  |
|    |       |      | Fluorene                           | 33357 000086-73-7 83 |                                                                                      |  |
|    |       |      | Fluorene                           | 33359 000086-73-7 81 |                                                                                      |  |
| 17 | 22.33 | 0.22 | D:\Database\NIST02.L               |                      |                                                                                      |  |
|    |       |      | Benzene, 1,1'-[oxybis(methylene... | 54991 000103-50-4 78 |    |  |
|    |       |      | Benzene, 1,1'-[oxybis(methylene... | 54989 000103-50-4 74 |                                                                                      |  |
|    |       |      | 4-Methylenebicyclo[4.2.0]oct-2-ene | 9150 1000211-19-9 72 |                                                                                      |  |
| 18 | 22.42 | 0.36 | D:\Database\NIST02.L               |                      |                                                                                      |  |
|    |       |      | 1(3H)-Isobenzofuranone             | 14733 000087-41-2 95 |    |  |
|    |       |      | 1(3H)-Isobenzofuranone             | 14735 000087-41-2 94 |                                                                                      |  |
|    |       |      | 1(3H)-Isobenzofuranone             | 14736 000087-41-2 91 |                                                                                      |  |
| 19 | 22.86 | 1.08 | D:\Database\NIST02.L               |                      |                                                                                      |  |
|    |       |      | Benzoic Acid                       | 9574 000065-85-0 91  |    |  |
|    |       |      | Benzoic Acid                       | 9573 000065-85-0 91  |                                                                                      |  |
|    |       |      | 2-Chloroethyl benzoate             | 46008 000939-55-9 83 |                                                                                      |  |
| 20 | 23.48 | 0.08 | D:\Database\NIST02.L               |                      |                                                                                      |  |
|    |       |      | 2H-1-Benzopyran-4-ol, 3,4-dihyd... | 73862 000487-25-2 16 |   |  |
|    |       |      | Benzenemethanol, 2-methyl-         | 9647 000089-95-2 14  |                                                                                      |  |
|    |       |      | Benzenemethanol, 2-methyl-         | 9643 000089-95-2 14  |                                                                                      |  |
| 21 | 23.59 | 0.22 | D:\Database\NIST02.L               |                      |                                                                                      |  |
|    |       |      | 4-Phenylbenzhydrazide              | 64225 018622-23-6 95 |  |  |
|    |       |      | Methyl biphenyl-4-carboxylate      | 64390 000720-75-2 90 |                                                                                      |  |
|    |       |      | 4-Phenylbenzhydrazide              | 64224 018622-23-6 89 |                                                                                      |  |
| 22 | 23.74 | 0.46 | D:\Database\NIST02.L               |                      |                                                                                      |  |
|    |       |      | 9H-Fluoren-9-ol                    | 44113 001689-64-1 91 |  |  |
|    |       |      | 2,4,6-Cycloheptatrien-1-one, 2-... | 44124 014562-09-5 91 |                                                                                      |  |
|    |       |      | 9H-Fluoren-9-ol                    | 44112 001689-64-1 87 |  |  |
| 23 | 23.92 | 0.64 | D:\Database\NIST02.L               |                      |                                                                                      |  |
|    |       |      | Methanone, (2-methylphenyl)phenyl- | 53605 000131-58-8 93 |  |  |
|    |       |      | Methanone, (2-methylphenyl)phenyl- | 53594 000131-58-8 93 |                                                                                      |  |
|    |       |      | Methanone, (2-methylphenyl)phenyl- | 53604 000131-58-8 93 |                                                                                      |  |
| 24 | 24.14 | 0.48 | D:\Database\NIST02.L               |                      |                                                                                      |  |
|    |       |      | 2H-1-Benzopyran-2-one              | 21318 000091-64-5 94 |  |  |
|    |       |      | 2H-1-Benzopyran-2-one              | 21317 000091-64-5 91 |                                                                                      |  |
|    |       |      | 2H-1-Benzopyran-2-one              | 21316 000091-64-5 87 |                                                                                      |  |

# Supporting Information

25 24.32 1.56 D:\Database\NIST02.L  
Benzophenone 44110 000119-61-9 95  
Benzophenone 44105 000119-61-9 94  
Benzophenone 44109 000119-61-9 94

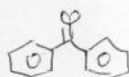

26 24.65 0.22 D:\Database\NIST02.L  
Benzoic acid, 3-methyl- 15712 000099-04-7 96  
Benzoic acid, 3-methyl- 15718 000099-04-7 96  
Benzoic acid, 4-methyl- 15710 000099-94-5 87

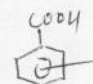

27 24.80 0.68 D:\Database\NIST02.L  
(E)-Stillbene 42778 000103-30-0 98  
(E)-Stillbene 42777 000103-30-0 98  
(E)-Stillbene 42773 000103-30-0 97

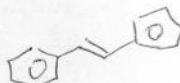

28 25.20 0.12 D:\Database\NIST02.L  
Benzenecetic acid 15708 000103-30-0 98  
Benzenecetic acid 15709 000103-30-0 87  
Benzenecetic acid 15707 000103-30-0 96

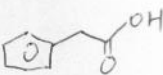

29 26.17 0.06 D:\Database\NIST02.L  
3,5-Diamino-1,2,4-triazole 3367 001455-77-2 43  
Oxamide, N-methyl-N'-[2-(4-pipe... 66054-294877-47-7 43  
Benzenecetic acid, alpha.-ethyl- 31655 000090-27-7 25

30 26.31 1.08 D:\Database\NIST02.L  
Methanone, (3-methylphenyl)phenyl- 53593 000643-65-2 97  
Methanone, (3-methylphenyl)phenyl- 53602 000643-65-2 96  
Methanone, (3-methylphenyl)phenyl- 53601 000643-65-2 96

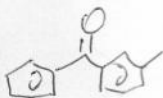

31 26.70 0.42 D:\Database\NIST02.L  
Benzenepropanoic acid 23324 000501-52-0 90  
Benzenepropanoic acid 23323 000501-52-0 90  
Benzenepropanoic acid 23322 000501-52-0 86

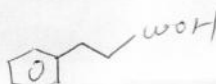

32 27.29 0.48 D:\Database\NIST02.L  
1,1',3'1"-Terphenyl, 5'-methyl- 84944 033733-07-2 83  
Naphthalene, 2-(1-methyl-2-phen... 84947 017181-02-1 74  
Pyrazine, 2,5-dimethyl-3,6-bis(...) 84881 1000115-60-1 58

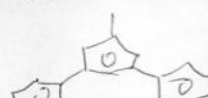

33 27.57 4.12 D:\Database\NIST02.L  
Benzyl Benzote 64373 000120-51-4 97  
Benzyl Benzote 64376 000120-51-4 95  
Benzyl Benzote 64375 000120-51-4 93

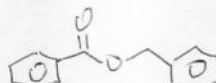

34 27.79 0.96 D:\Database\NIST02.L  
1,4-Methanonaphthalen-9-ol, 1,2... 57344 001207-27-8 50  
Fluoren-9-one, 9a-hydroxy-1,2,3... 57340 1000160-37-9 27  
5-Benzylidene-2-tert-butyl-6-me... 94485 1000287-46-4 27

35 27.89 0.54 D:\Database\NIST02.L  
O-Terphenyl 76465 000084-15-1 95  
O-Terphenyl 76469 000084-15-1 91  
O-Terphenyl 76470 000084-15-1 91

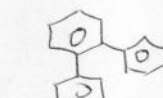

36 28.45 6.14 D:\Database\NIST02.L  
Ethanone, 1,2-diphenyl- 53577 000451-40-1 91  
Ethanone, 1,2-diphenyl- 53580 000451-40-1 91  
+/-2-phenylbutyrophenone 72463 077542-11-1 78

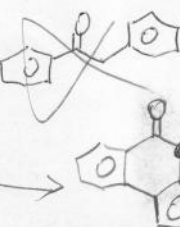

? MW 196



# Supporting Information

|    |       |                                    |                      |
|----|-------|------------------------------------|----------------------|
| 37 | 28.74 | 0.15 D:\Database\NIST02.L          |                      |
|    |       | benzyl o-toluate                   | 73819 067157-60-2 49 |
|    |       | 1-Bromo-1-phenylpropane X          | 55327 002114-36-5 43 |
|    |       | N-benzyl-1H-benzimidazole X        | 61570 004981-92-4 43 |
| 38 | 28.87 | 0.88 D:\Database\NIST02.L          |                      |
|    |       | Naphthalene, 2-(1-methyl-2-phen... | 84947 017181-02-1 95 |
|    |       | Coumarine, 8-allyl-7-hydroxy-6-    | 84801 298686-57-4 53 |
|    |       | 2H-1-Benzopyran-2-one, 7-methox... | 84806 000581-31-7 50 |
| 39 | 29.20 | 0.23 D:\Database\NIST02.L          |                      |
|    |       | Benzeneacetic acid, phenylmethy... | 73855 000102-16-9 58 |
|    |       | 4-Benzoyloxybenzonitrile           | 62301 052805-36-4 52 |
|    |       | Benzene, (iodomethyl)-             | 68359 000620-05-3 50 |
| 40 | 29.62 | 0.06 D:\Database\NIST02.L          |                      |
|    |       | Benz[3,4]anthra[1,2-b]oxirene,...  | 93474 001155-38-0 55 |
|    |       | 2',5'-Dimethyl-p-terphenyl         | 93489 020260-22-4 53 |
|    |       | 1,2,3,10,11,12-Hexahydroperylene   | 93491 007350-92-7 50 |
| 41 | 30.54 | 1.15 D:\Database\NIST02.L          |                      |
|    |       | Naphthalene, 2-91-methyl-2-phen... | 84947 017181-02-1 86 |
|    |       | Benzoic acid, 4-methyl-, phenyl... | 73863 005467-99-2 40 |
|    |       | 1,1',4,1"-Terphenyl-, 3'-methyl-   | 84945 033776-38-4 30 |
| 42 | 30.89 | 0.13 D:\Database\NIST02.L          |                      |
|    |       | Phenanthrene                       | 41356 000085-01-8 64 |
|    |       | 2-Cyclopropen-1-one, 2,3-diphenyl- | 60289 000886-38-4 64 |
|    |       | Anthracene                         | 41350 000120-12-7 64 |
| 43 | 31.00 | 0.11 D:\Database\NIST02.L          |                      |
|    |       | 1,4-Cyclohexadiene, 6-methylene... | 84948 018636-59-4 87 |
|    |       | 1,1',4,1"-terphenyl-, 3'-methyl-   | 84945 033776-38-4 64 |
|    |       | 1,1'-Biphenyl, 2-(phenylmethyl)-   | 84943 000606-97-3 58 |
| 44 | 31.49 | 0.52 D:\Database\NIST02.L          |                      |
|    |       | Benzyl p-toluate                   | 73820 001711-35-9 91 |
|    |       | Benzoic acid, 4-methyl-, phenyl... | 73863 005467-99-2 70 |
|    |       | Benzamide, 2-methyl-N-phenyl-      | 63642 007055-03-0 59 |
| 45 | 31.78 | 3.52 D:\Database\NIST02.L          |                      |
|    |       | 9H-Fluoren-9-one ✓                 | 42768 000486-25-9 93 |
|    |       | 9H-Fluoren-9-one ✓                 | 42769 000486-25-9 93 |
|    |       | 9H-Fluoren-9-one                   | 42766 000486-25-9 91 |
| 46 | 32.13 | 1.06 D:\Database\NIST02.L          |                      |
|    |       | .beta.-Phenylpropiophenone         | 63006 001083-30-3 94 |
|    |       | .beta.-Phenylpropiophenone         | 63010 001083-30-3 86 |
|    |       | 1-Pentanone, 4,4-dimethyl-1,3-d... | 98159 057847-40-2 64 |
| 47 | 32.83 | 0.06 D:\Database\NIST02.L          |                      |
|    |       | 4-Benzylbiphenyl                   | 84938 000613-42-3 93 |
|    |       | 1,1',4,1"-terphenyl-, 3'-methyl-   | 84945 033776-38-4 84 |
|    |       | 1,1',3,1"-terphenyl-, 5'-methyl-   | 84944 033733-07-2 81 |
| 48 | 33.15 | 0.22 D:\Database\NIST02.L          |                      |
|    |       | Anthrone                           | 52034 000090-44-8 95 |
|    |       | Anthrone                           | 52035 000090-44-8 95 |
|    |       | 3-Phenanthrol                      | 52038 000605-87-8 94 |

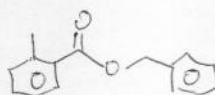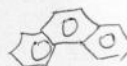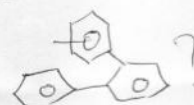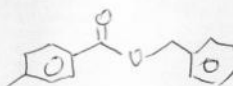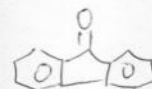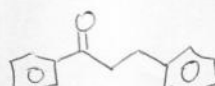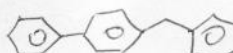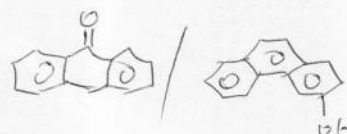

# Supporting Information

|    |       |                                                                                                                                             |                                                                       |
|----|-------|---------------------------------------------------------------------------------------------------------------------------------------------|-----------------------------------------------------------------------|
| 49 | 33.57 | 0.65 D:\Database\NIST02.L<br>Benzenecetic acid, alpha, -hyd...<br>Benzenecetic acid, 4-ethoxy-<br>1-Butanol, 4-(phenylmethoxy)-             | 42323 000774-40-3 53<br>42222 004919-33-9 47<br>42462 004541-14-4 47  |
| 50 | 33.67 | 0.52 D:\Database\NIST02.L<br>Ethanedione, diphenyl-<br>beta-Phenylpropiophenone<br>Benzoic acid, (4-benzoyloxy-2-c...                       | 62903 000134-81-6 78<br>63006 001083-30-3 78<br>141897 122842-83-5 50 |
| 51 | 34.42 | 0.38 D:\Database\NIST02.L<br>1,1',4,1"-terphenyl-, 3'-methyl-<br>1,1'-Biphenyl, 2-(phenylmethyl)-<br>1,1',3,1"-terphenyl-, 5'-methyl-       | 84945 033776-38-4 98<br>84943 000606-97-3 94<br>84944 033733-07-2 93  |
| 52 | 34.71 | 0.25 D:\Database\NIST02.L<br>4,5-Dimethoxy-2-biphenylcarboxy...<br>2',5'-Dimethyl-p-terphenyl<br>5,7-Dimethyl-6-phenyl-1,3-diaza...         | 93227 162137-38-4 45<br>93489 020260-22-4 43<br>93371 1000216-37-9 38 |
| 53 | 35.70 | 0.12 D:\Database\NIST02.L<br>Ethanone, 2,2-dichloro-1-(4-met...<br>Benzoic acid, 4-methyl-, phenyl...<br>3,4,6-Trimethylthiopyrazolo[3,4... | 57712 004974-59-8 30<br>64427 001900-85-2 25<br>93563 130224-57-6 25  |
| 54 | 36.57 | 0.28 D:\Database\NIST02.L<br>Anthrone<br>Anthrone<br>Anthrone                                                                               | 52034 000090-44-8 93<br>52036 000090-44-8 91<br>52035 000090-44-8 87  |
| 55 | 36.67 | 0.12 D:\Database\NIST02.L<br>2',5'-Dimethyl-p-terphenyl<br>4,5,7,8,9,10-Hexahydrobenzo(a)p...<br>E-1-(9'-Fluorenylidene)-2-cyano...         | 93489 020260-22-4 46<br>93494 073712-75-1 46<br>93450 083026-87-3 43  |
| 56 | 38.21 | 0.15 D:\Database\NIST02.L<br>Anthrone<br>Anthrone<br>Anthrone                                                                               | 52036 000090-44-8 94<br>52034 000090-44-8 94<br>52035 000090-44-8 91  |
| 57 | 40.05 | 0.25 D:\Database\NIST02.L<br>4-Benzylbiphenyl<br>1,1',4,1"-terphenyl-, 3'-methyl-<br>1,1'-Biphenyl, 2-(phenylmethyl)-                       | 84939 000613-42-3 96<br>84945 033776-38-4 93<br>84943 000606-97-3 89  |
| 58 | 44.15 | 0.88 D:\Database\NIST02.L<br>2-Propen-1-one, 1,3-diphenyl-<br>2-Propen-1-one, 1,3-diphenyl-<br>2-Propen-1-one, 1,3-diphenyl-                | 61681 000094-41-7 94<br>61689 000614-47-1 90<br>61683 000094-41-7 90  |
| 59 | 44.71 | 0.69 D:\Database\NIST02.L<br>1,1',4,1"-terphenyl-, 3'-methyl-<br>4-Benzylbiphenyl<br>4-Benzylbiphenyl                                       | 84945 033776-38-4 91<br>84939 000613-42-3 90<br>84938 000613-42-3 90  |
| 60 | 45.00 | 0.26 D:\Database\NIST02.L<br>1,1',4,1"-terphenyl-, 3'-methyl-<br>1,4-Cyclonexdiene,6-methylene...<br>1,1',3,1"-Terphenyl, 5'-methyl-        | 84945 033776-38-4 93<br>84948 018636-59-4 90<br>84944 033733-07-2 76  |

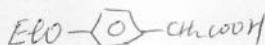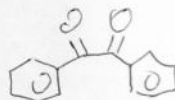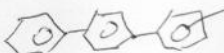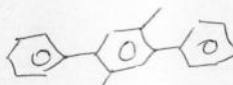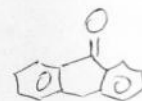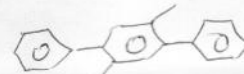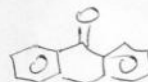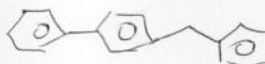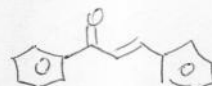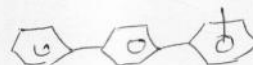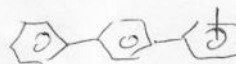

# Supporting Information

|    |        |                                                                                                                                             |                                                                       |  |
|----|--------|---------------------------------------------------------------------------------------------------------------------------------------------|-----------------------------------------------------------------------|--|
| 61 | 48.06  | 0.39 D:\Database\NIST02.L<br>m-Terphenyl<br>m-Terphenyl<br>m-Terphenyl                                                                      | 76475 000092-06-8 98<br>76474 000092-06-8 98<br>76471 000092-94-4 96  |  |
| 62 | 48.75  | 0.64 D:\Database\NIST02.L<br>9,10-Anthracenedione<br>9H-Fluoren-9-one<br>1H-Phenalen-1-one                                                  | 61655 000084-65-1 90<br>42767 000486-25-9 60<br>42770 000548-39-0 55  |  |
| 63 | 52.48  | 0.98 D:\Database\NIST02.L<br>3H-Indazol-3-one, 1,2-dihydra-2...<br>Benzamide, N-(2'-iodophenyl)-N-...<br>Benzene, 1-methoxy-2-(2-phenyle... | 62792 017049-65-9 53<br>135712 138883-34-8 47<br>63038 052805-92-2 47 |  |
| 64 | 53.07  | 2.82 D:\Database\NIST02.L<br>4-Hydroxy-9-fluorenone<br>9H-Fluoren-9-one, 1-hydroxy-<br>4-Hydroxy-9-fluorenone                               | 53564 001986-00-1 95<br>53565 006344-60-1 93<br>53563 001986-00-1 93  |  |
| 65 | 54.21  | 0.37 D:\Database\NIST02.L<br>p-Terphenyl<br>p-Terphenyl<br>m-Terphenyl                                                                      | 76473 000092-94-4 97<br>76471 000092-94-4 95<br>76467 000092-06-8 93  |  |
| 66 | 54.70  | 1.12 D:\Database\NIST02.L<br>4-Benzylbiphenyl<br>4-Benzylbiphenyl<br>Triphenylmethane                                                       | 84939 000613-42-3 98<br>84938 000613-42-3 95<br>84940 000519-73-3 81  |  |
| 67 | 72.37  | 1.28 D:\Database\NIST02.L<br>2-Biphenylcarboxylic acid<br>2-Biphenylcarboxylic acid<br>Biphenyl-4-carboxylic acid                           | 54844 000947-84-2 91<br>54843 000947-84-2 90<br>54846 000092-92-2 62  |  |
| 68 | 76.01  | 1.25 D:\Database\NIST02.L<br>3-(1-naphthyl)acrylaldehyde<br>2,4,6-cycloheptatrien-1-one, 2-...<br>Mopholine, 4-(1-cyclopenten-1-...         | 44116 001504-73-0 52<br>44124 014562-09-5 47<br>43350 007182-08-3 46  |  |
| 69 | 97.57  | 0.56 D:\Database\NIST02.L<br>(1,1'-Biphenyl)-2-acetic acid<br>9H-Fluoren-9-one, hydrazone<br>Anthrone                                       | 64391 014676-52-9 74<br>51937 013629-22-5 62<br>52036 000090-44-8 62  |  |
| 70 | 108.26 | 1.05 D:\Database\NIST02.L<br>4-Amino-4'-hydroxystilbene<br>(1,1'-Biphenyl)-2-ol, 5-(1,1-di...<br>10H-Phenoxasim, 10,10-dimethyl-            | 63634 000836-44-2 43<br>73950 000577-92-4 38<br>73733 018414-62-5 35  |  |
| 71 | 111.45 | 17.42 D:\Database\NIST02.L<br>(1,1'-Biphenyl)-3-carboxylic acid ✓<br>2-Biphenylcarboxylic acid<br>Biphenyl-4-carboxylic acid                | 54854 000716-76-7 97<br>54843 000947-84-2 87<br>54846 000092-92-2 81  |  |
| 72 | 117.52 | 20.38 D:\Database\NIST02.L<br>Biphenyl-4-carboxylic acid ✓<br>Biphenyl-4-carboxylic acid<br>Biphenyl-4-carboxylic acid                      | 54846 000092-92-2 98<br>54850 000092-92-2 97<br>54851 000092-92-2 93  |  |

**Figure S8.** LC-MS analytical report of yellow solid mixture

## Supporting Information

**Table S1.** Waste water analytical reports for separating pure 9-fluorenone from the benzyl benzoate residue (originals given in Chinese are followed by English translation)

苯甲酸生产废料回收利用项目生产废水抽样检测结果(2) 省环评项目

| 序号 | 测试项目       | 水样测试结果 <sup>a,b</sup> |                      |                      |
|----|------------|-----------------------|----------------------|----------------------|
|    |            | 水样 1<br>(2010.03.23)  | 水样 2<br>(2010.03.24) | 水样 3<br>(2010.03.25) |
| 1  | pH 值       | 6.0                   | 6.5                  | 6.5                  |
| 2  | 色度         | 8                     | 12                   | 18                   |
| 3  | 悬浮物        | 16                    | 18                   | 21                   |
| 4  | 五日生化需氧量    | 5                     | 8                    | 6                    |
| 5  | 化学需氧量      | 25                    | 22                   | 30                   |
| 6  | 氨氮 (以 N 计) | 2                     | 3                    | 2                    |
| 7  | 总氮         | 3                     | 4                    | 3                    |
| 8  | 总磷         | 0.1                   | 0.1                  | 0.1                  |
| 9  | 总有机碳       | 16                    | 18                   | 12                   |
| 10 | 硫化物        | 未检出                   | 未检出                  | 未检出                  |
| 11 | 硝基苯类       | 未检出                   | 未检出                  | 未检出                  |
| 12 | 苯胺类        | 未检出                   | 未检出                  | 未检出                  |
| 13 | 总氰化物       | 未检出                   | 未检出                  | 未检出                  |
| 14 | 总汞         | 未检出                   | 未检出                  | 未检出                  |
| 15 | 六价铬        | 未检出                   | 未检出                  | 未检出                  |

a. 废水样品从车间废水排放口采集;

b. 测试项目单位为 mg/L (pH 值和色度除外)。

## Supporting Information

| Entry | Test Item              | Test Result <sup>a,b</sup>     |                                |                                |
|-------|------------------------|--------------------------------|--------------------------------|--------------------------------|
|       |                        | Waste Sample 1<br>(2010.03.23) | Waste Sample 2<br>(2010.03.24) | Waste Sample 3<br>(2010.03.25) |
| 1     | pH Value               | 6.0                            | 6.5                            | 6.5                            |
| 2     | Chroma                 | 8                              | 12                             | 18                             |
| 3     | Suspended Material     | 16                             | 18                             | 21                             |
| 4     | BOD5                   | 5                              | 8                              | 6                              |
| 5     | Chemical Oxygen Demand | 25                             | 22                             | 30                             |
| 6     | Ammonia Nitrogen       | 2                              | 3                              | 2                              |
| 7     | Total Nitrogen         | 3                              | 4                              | 3                              |
| 8     | Total Phosphorus       | 0.1                            | 0.1                            | 0.1                            |
| 9     | Total Organic Carbon   | 16                             | 18                             | 12                             |
| 10    | Sulfide                | undetected                     | undetected                     | undetected                     |
| 11    | Nitrobenzenes          | undetected                     | undetected                     | undetected                     |
| 12    | Phenyl amines          | undetected                     | undetected                     | undetected                     |
| 13    | Total Cyanide          | undetected                     | undetected                     | undetected                     |
| 14    | Total Mercury          | undetected                     | undetected                     | undetected                     |
| 15    | Hexavalent Chrome      | undetected                     | undetected                     | undetected                     |

a. The wastewater samples were collected from from workshop wastewater outfalls;

b. The unit is mg/L (except pH and Chroma).



## Supporting Information

**Table S2.** Waste water analytical reports for separating 6H-benzo[c]chromen-6-one, biphenyl-3-carboxylic acid and biphenyl-4-carboxylic acid mixture from the yellow solid mixture (originals given in Chinese are followed by English translation)

苯甲酸生产废料回收利用项目生产废水抽样检测结果(1) 混合苯甲酸分离项目

| 序号 | 测试项目       | 水样测试结果 a,b           |                      |                      |
|----|------------|----------------------|----------------------|----------------------|
|    |            | 水样 1<br>(2009.09.02) | 水样 2<br>(2009.09.03) | 水样 3<br>(2009.09.04) |
| 1  | pH 值       | 6.5                  | 6.0                  | 6.0                  |
| 2  | 色度         | 15                   | 10                   | 21                   |
| 3  | 悬浮物        | 22                   | 15                   | 25                   |
| 4  | 五日生化需氧量    | 8                    | 6                    | 5                    |
| 5  | 化学需氧量      | 16                   | 12                   | 25                   |
| 6  | 氨氮 (以 N 计) | 1                    | 1                    | 0.6                  |
| 7  | 总氮         | 2                    | 1.6                  | 1                    |
| 8  | 总磷         | 0.1                  | 0.1                  | 0.1                  |
| 9  | 总有机碳       | 18                   | 12                   | 20                   |
| 10 | 硫化物        | 未检出                  | 未检出                  | 未检出                  |
| 11 | 硝基苯类       | 未检出                  | 未检出                  | 未检出                  |
| 12 | 苯胺类        | 未检出                  | 未检出                  | 未检出                  |
| 13 | 总氰化物       | 未检出                  | 未检出                  | 未检出                  |
| 14 | 总汞         | 未检出                  | 未检出                  | 未检出                  |
| 15 | 六价铬        | 未检出                  | 未检出                  | 未检出                  |

a. 废水样品从车间废水排放口采集;  
b. 测试项目单位为 mg/L (pH 值和色度除外)。

*Handwritten notes:*

- 左侧: 主要污染物是什么? (Main pollutants are what?)
- 左侧: 来自有机碳吗? (From organic carbon?)
- 左侧: 检测过吗? 不用管 (Detected? No need to worry)
- 右侧: 氨氮和总氮来自哪里? (Ammonia nitrogen and total nitrogen from where?)
- 右侧: 无氰化物、硝基苯类、苯胺类、总氰化物、总汞、六价铬 (No cyanide, nitrobenzene, aniline, total cyanide, total mercury, hexavalent chromium)

## Supporting Information

| Entry | Test Item              | Test Result <sup>a,b</sup>     |                                |                                |
|-------|------------------------|--------------------------------|--------------------------------|--------------------------------|
|       |                        | Waste Sample 1<br>(2009.09.02) | Waste Sample 2<br>(2009.09.03) | Waste Sample 3<br>(2009.09.04) |
| 1     | pH Value               | 6.5                            | 6.0                            | 6.0                            |
| 2     | Chroma                 | 15                             | 10                             | 21                             |
| 3     | Suspended Material     | 22                             | 15                             | 25                             |
| 4     | BOD5                   | 8                              | 6                              | 5                              |
| 5     | Chemical Oxygen Demand | 16                             | 12                             | 25                             |
| 6     | Ammonia Nitrogen       | 1                              | 1                              | 0.6                            |
| 7     | Total Nitrogen         | 2                              | 1.6                            | 1                              |
| 8     | Total Phosphorus       | 0.1                            | 0.1                            | 0.1                            |
| 9     | Total Organic Carbon   | 18                             | 12                             | 20                             |
| 10    | Sulfide                | undetected                     | undetected                     | undetected                     |
| 11    | Nitrobenzenes          | undetected                     | undetected                     | undetected                     |
| 12    | Phenyl amines          | undetected                     | undetected                     | undetected                     |
| 13    | Total Cyanide          | undetected                     | undetected                     | undetected                     |
| 14    | Total Mercury          | undetected                     | undetected                     | undetected                     |
| 15    | Hexavalent Chrome      | undetected                     | undetected                     | undetected                     |

a. The wastewater samples were collected from from workshop wastewater outfalls;

b. The unit is mg/L (except pH and Chroma).
